# Supplementary material
Source: MDPI journal article supplement (https://www.mdpi.com/1996-1073/16/9/3885)
Supplement: s1 [file s1]

## Supplementary material

**Table S1** Livestock population in Europe in 2016

|                | <b>Total livestock</b> | <b>Equidae</b> | <b>Cattle</b> | <b>Pigs</b> | <b>Sheep</b> | <b>Goats</b> | <b>Poultry</b> |
|----------------|------------------------|----------------|---------------|-------------|--------------|--------------|----------------|
| <b>Belgium</b> | 100                    | 0,6            | 46,9          | 39,9        | 0,2          | 0,1          | 12,2           |
| Bulgaria       | 100                    | 4,9            | 45,8          | 16,1        | 12,0         | 2,4          | 18,6           |
| Czechia        | 100                    | 1,1            | 58,0          | 20,2        | 1,3          | 0,1          | 19,3           |
| Denmark        | 100                    | 1,0            | 27,2          | 66,8        | 0,4          | 0,0          | 4,6            |
| Germany        | 100                    | 1,9            | 49,3          | 35,6        | 1,0          | 0,1          | 12,0           |
| Estonia        | 100                    | 1,6            | 67,9          | 20,3        | 3,3          | 0,2          | 6,8            |
| Ireland        | 100                    | 1,2            | 82,4          | 6,3         | 8,3          | 0,0          | 1,8            |
| Greece         | 100                    | 0,6            | 21,8          | 8,1         | 39,1         | 16,8         | 13,3           |
| Spain          | 100                    | 1,7            | 30,2          | 39,3        | 11,0         | 1,7          | 15,9           |
| France         | 100                    | 1,4            | 61,5          | 13,9        | 3,1          | 0,5          | 19,7           |
| Croatia        | 100                    | 2,6            | 41,0          | 30,3        | 10,3         | 1,3          | 14,3           |
| Italy          | 100                    | 1,4            | 48,1          | 21,5        | 7,4          | 1,0          | 20,4           |
| Cyprus         | 100                    | 2,0            | 23,2          | 35,3        | 15,4         | 9,9          | 14,1           |
| Latvia         | 100                    | 1,3            | 65,2          | 19,0        | 2,6          | 0,3          | 11,4           |
| Lithuania      | 100                    | 1,4            | 66,5          | 16,1        | 2,2          | 0,2          | 13,6           |
| Luxembourg     | 100                    | 2,1            | 83,9          | 12,3        | 0,5          | 0,3          | 0,9            |
| Hungary        | 100                    | 2,0            | 25,3          | 30,3        | 5,0          | 0,4          | 37,0           |
| Malta          | 100                    | 3,2            | 34,3          | 32,2        | 4,0          | 1,4          | 24,2           |
| Netherlands    | 100                    | 1,0            | 44,2          | 35,6        | 1,1          | 0,7          | 17,4           |
| Austria        | 100                    | 2,9            | 56,5          | 28,8        | 1,6          | 0,4          | 9,8            |
| Poland         | 100                    | 1,6            | 46,4          | 28,0        | 0,3          | 0,0          | 23,6           |
| Portugal       | 100                    | 1,5            | 50,2          | 19,5        | 9,9          | 1,8          | 17,0           |
| Romania        | 100                    | 6,0            | 32,8          | 20,5        | 18,9         | 2,8          | 18,8           |
| Slovenia       | 100                    | 3,0            | 66,7          | 13,1        | 2,6          | 0,8          | 13,7           |
| Slovakia       | 100                    | 1,0            | 52,8          | 19,1        | 6,0          | 0,3          | 20,8           |
| Finland        | 100                    | 1,5            | 59,8          | 22,9        | 1,5          | 0,0          | 14,3           |
| Sweden         | 100                    | 4,7            | 60,7          | 19,4        | 3,4          | 0,0          | 11,8           |
| United Kingdom | 100                    | 1,6            | 51,9          | 8,4         | 25,0         | 0,1          | 13,1           |
| <b>EU-28</b>   | <b>100</b>             | <b>1,7</b>     | <b>49,0</b>   | <b>25,2</b> | <b>7,3</b>   | <b>0,9</b>   | <b>15,8</b>    |

**Table S2** Total livestock unit (heads) in Europe in 2016

|                | <b>Total livestock</b> | <b>Equidae</b>   | <b>Cattle</b>     | <b>Pigs</b>       | <b>Sheep</b>     | <b>Goats</b>     | <b>Poultry</b>    |
|----------------|------------------------|------------------|-------------------|-------------------|------------------|------------------|-------------------|
| Belgium        | 3 772 750              | 22 450           | 1 767 700         | 1 506 820         | 8 620            | 5 080            | 462 090           |
| Bulgaria       | 1 094 240              | 54 080           | 501 070           | 176 230           | 131 640          | 26 660           | 203 550           |
| Czechia        | 1 756 520              | 20 040           | 1 018 090         | 354 090           | 23 090           | 2 200            | 338 850           |
| Denmark        | 4 128 470              | 41 030           | 1 124 300         | 2 758 720         | 14 720           | 1 300            | 188 380           |
| Germany        | 18 182 310             | 349 460          | 8 968 180         | 6 475 000         | 185 600          | 13 810           | 2 190 260         |
| Estonia        | 279 330                | 4 590            | 189 610           | 56 570            | 9 080            | 450              | 18 990            |
| Ireland        | 6 195 640              | 76 830           | 5 105 030         | 388 690           | 514 040          | 920              | 110 130           |
| Greece         | 2 102 870              | 13 410           | 459 090           | 170 750           | 822 760          | 354 170          | 280 410           |
| Spain          | 14 442 530             | 250 180          | 4 365 390         | 5 675 710         | 1 586 220        | 249 070          | 2 293 560         |
| France         | 22 081 990             | 301 690          | 13 573 320        | 3 068 020         | 674 430          | 101 440          | 4 351 490         |
| Croatia        | 754 710                | 19 650           | 309 240           | 228 370           | 77 820           | 9 960            | 107 980           |
| Italy          | 9 467 720              | 131 820          | 4 554 050         | 2 036 140         | 702 650          | 98 200           | 1 930 920         |
| Cyprus         | 172 080                | 3 380            | 39 900            | 60 770            | 26 480           | 17 000           | 24 240            |
| Latvia         | 498 640                | 6 720            | 325 010           | 94 750            | 13 000           | 1 410            | 56 640            |
| Lithuania      | 849 990                | 11 780           | 564 970           | 137 110           | 18 720           | 1 400            | 115 380           |
| Luxembourg     | 173 600                | 3 630            | 145 700           | 21 270            | 900              | 510              | 1 580             |
| Hungary        | 2 444 890              | 47 730           | 618 040           | 740 220           | 121 350          | 10 020           | 905 010           |
| Malta          | 32 470                 | 1 050            | 11 130            | 10 460            | 1 310            | 450              | 7 870             |
| Netherlands    | 6 819 960              | 65 850           | 3 011 520         | 2 427 240         | 78 390           | 49 960           | 1 186 110         |
| Austria        | 2 432 030              | 69 780           | 1 374 350         | 699 400           | 39 850           | 9 110            | 239 540           |
| Poland         | 9 443 240              | 148 390          | 4 384 760         | 2 643 190         | 25 340           | 4 420            | 2 230 140         |
| Portugal       | 2 223 720              | 34 230           | 1 116 360         | 434 430           | 219 970          | 39 050           | 377 550           |
| Romania        | 4 828 780              | 290 650          | 1 584 790         | 991 710           | 910 650          | 137 280          | 908 840           |
| Slovenia       | 512 120                | 15 560           | 341 330           | 67 060            | 13 490           | 3 860            | 70 320            |
| Slovakia       | 621 590                | 6 180            | 328 220           | 118 470           | 37 410           | 1 640            | 129 520           |
| Finland        | 1 070 630              | 15 770           | 639 780           | 245 380           | 15 650           | 480              | 153 570           |
| Sweden         | 1 705 790              | 81 000           | 1 035 740         | 330 750           | 57 820           | :                | 200 480           |
| United Kingdom | 13 251 820             | 208 360          | 6 875 020         | 1 115 500         | 3 313 380        | 9 980            | 1 729 580         |
| <b>EU-28</b>   | <b>131 340 430</b>     | <b>2 295 290</b> | <b>64 331 690</b> | <b>33 032 820</b> | <b>9 644 380</b> | <b>1 149 830</b> | <b>20 812 980</b> |
